# Supplementary material
Source: HighWire-hosted journal article supplement (https://cmajopen-stage.highwire.org/highwire/filestream/88517/field_highwire_adjunct_files/1/open-2021-0176-original-submission.pdf)
Supplement: open-2021-0176-original-submission.pdf [file open-2021-0176-original-submission.pdf]

# Characteristics and treatment differences in hospitalized older adults with COVID-19 during waves 1 and 2: a multicentre case series

Eric Kai-Chung Wong<sup>1,2,3</sup>

Jennifer Watt<sup>1,2,3</sup>

Hanyan Zou<sup>4</sup>

Arthana Chandraraj<sup>1</sup>

Alissa Wenyue Zhang<sup>5</sup>

Jahnel Brookes<sup>6</sup>

Ashley Verduyn<sup>7</sup>

Anna Berall<sup>6</sup>

Richard Norman<sup>3,4</sup>

Katrina Piggott<sup>3,5</sup>

Terumi Izukawa<sup>3,6,8</sup>

Sharon E. Straus<sup>1,2,3</sup>

Barbara Liu<sup>3,5</sup>

1. Li Ka Shing Knowledge Institute, St. Michael's Hospital, Unity Health Toronto, Toronto, Canada
2. Division of Geriatric Medicine, Department of Medicine, St. Michael's Hospital, Unity Health Toronto, Toronto, Canada
3. Division of Geriatric Medicine, Department of Medicine, University of Toronto, Toronto, Canada
4. Division of Geriatric Medicine, Department of Medicine, Sinai Health and University Health Network, Toronto, Canada
5. Division of Geriatric Medicine, Department of Medicine, Sunnybrook Health Sciences Centre, Toronto, Canada
6. Kunin-Lunenfeld Centre for Applied Research & Evaluation, Rotman Research Institute, Baycrest Health Sciences Centre, Toronto, Canada
7. Providence Healthcare and Houses of Providence, Unity Health Toronto, Toronto, Canada
8. Division of Geriatric Medicine, Department of Medicine, Baycrest Health Sciences Centre, Toronto, Canada

## Corresponding author

Barbara Liu

Professor, Department of Medicine, University of Toronto

Sunnybrook Health Sciences Centre

2075 Bayview Ave., Room H4 79

Toronto, ON M4N 3M5

Phone: 416-480-6766  
Fax: 416-480-6068  
Email: [barbara.liu@sunnybrook.ca](mailto:barbara.liu@sunnybrook.ca)

**Abbreviated title:** Wave 2 characteristics in COVID-19

**Funding:** Academic Health Science Centre Alternate Funding Plans (AFP) Innovative Funds from Unity Health Toronto and Baycrest Health Sciences; Sinai Heath/University Health Network Healthy Ageing and Geriatrics Program and its Geriatrics Summer Scholars Program; Division of Geriatric Medicine and General Internal Medicine, Sunnybrook Health Sciences Centre.

**Keywords:** COVID-19, older adults, delirium, frailty, wave 2, dexamethasone

**ACKNOWLEDGEMENTS**

We thank Dr. George Tomlinson for providing feedback for our statistical analysis; Dr. Camilla Wong for providing training for chart abstraction; Dr. Samir Sinha and Dr. Rajin Mehta for assistance with funding and site project support.

**Conflict of interest:** The authors have no conflicts to disclose.

**Author contributions:**

Study concept and design: Eric Wong, Jennifer Watt, Barbara Liu, Sharon Straus

Acquisition of data and subjects: Eric Wong, Jennifer Watt, Hannah Zou, Arthana Chandraraj, Alissa Zhang, Jahnel Brookes, Ashley Verduyn, Anna Berall, Richard Norman, Katrina Piggott, Terumi Izukawa, Sharon Straus, Barbara Liu

Analysis and interpretation of data: Eric Wong, Jennifer Watt, Hannah Zou, Arthana Chandraraj, Alissa Zhang, Jahnel Brookes, Ashley Verduyn, Anna Berall, Richard Norman, Katrina Piggott, Terumi Izukawa, Sharon Straus, Barbara Liu

Preparation of manuscript: Eric Wong, Jennifer Watt, Hannah Zou, Arthana Chandraraj, Alissa Zhang, Jahnel Brookes, Ashley Verduyn, Anna Berall, Richard Norman, Katrina Piggott, Terumi Izukawa, Sharon Straus, Barbara Liu

**Sponsor's role:** The sponsor has no role in this study's design, method, subject recruitment, data collection, analysis and manuscript.

# Characteristics and treatment differences in hospitalized older adults with COVID-19 during waves 1 and 2: a multicentre case series

## Abstract

The first and second waves of COVID-19 infections in Ontario, Canada, were marked by differences in patient characteristics and treatment. Our objectives were to compare (i) patient characteristics, treatment and outcomes of hospitalized older adults with COVID-19 between waves 1 and 2, and (ii) patient characteristics and outcomes in those receiving dexamethasone, remdesivir and tocilizumab during wave 2.

## Methods

We completed this case series in seven hospitals in Toronto, Canada. Hospitalized older adults aged  $\geq 65$  years with confirmed COVID-19 infection were included. Wave 1 extended from March 11 to July 31, 2020 and wave 2 from August 1, 2020 to April 30, 2021. Patient characteristics and outcomes were abstracted from charts and analyzed descriptively. A multivariable model was used to determine the association of dexamethasone and delirium.

## Results

In acute care hospitals, 296 patients were admitted in wave 1 and 631 patients in wave 2. Patients were older in wave 2 than in wave 1 (median age 80.0 vs. 78.0 years,  $p=0.016$ ) but frailty was similar. There was increased use of dexamethasone in wave 2, but it was not independently associated with delirium incidence (adjusted odds ratio 1.18, 95% confidence interval 0.73–1.95). There were no differences in mortality, delirium, ICU admissions or complications between waves. Length of stay was reduced by 3 days in wave 2 (median 10.0 vs. 13.0 days in wave 1,  $p=0.034$ ).

## Interpretation

Despite better treatment, outcomes in hospitalized older adults with COVID-19 were similar between the two waves except for shorter length of stay.

1 Introduction

2 The COVID-19 pandemic was marked by multiple waves as the infection waxed and  
3 waned. The waves of COVID-19 infection in Ontario, Canada were due to seasonality [1],  
4 changes in public health measures [2], and the emergence of new COVID-19 strains [3]. Little  
5 was known about the treatment of COVID-19 during the first wave of hospitalizations, which  
6 predominantly affected older adults [4]. When the second wave started on August 1, 2020 [5],  
7 there was more familiarity with isolation measures and more treatments available, but concerns  
8 remained about hospital capacity during the winter [6]. Wave 2 led to over 10 times more cases  
9 than wave 1 [7].

10 While the virus was evolving, vaccines and therapeutic drugs were rapidly developed  
11 worldwide [8]. Vaccination of long-term care (LTC) residents in Ontario led to a dramatic  
12 reduction of infections [9], but most community-dwelling older adults were vaccinated at the end  
13 of wave 2 [10]. As a result, older adults continued to be infected and hospitalized in wave 2.  
14 Fortunately, new therapies were found to be effective for treatment of hospitalized COVID-19  
15 patients, including dexamethasone [11], remdesivir [12] and tocilizumab [13]. The use of  
16 dexamethasone led to concerns of increased delirium risk in older adults [14].

17 Given the differences in disease characteristics and treatment strategies between the two  
18 waves, we wanted to assess outcome differences in hospitalized older adults with COVID-19.  
19 Our objectives were to compare (i) differences in patient characteristics, treatment and outcomes  
20 of hospitalized older adults with COVID-19 between waves 1 and 2, and (ii) patient  
21 characteristics and outcomes in those receiving dexamethasone, remdesivir and tocilizumab  
22 during wave 2.

Characteristics and treatment differences in hospitalized older adults with COVID-19 during waves 1 and 2: a multicentre case series

## Methods

This multicentre case series included patients admitted to seven hospitals in Toronto, Canada from March 11, 2020 to April 30, 2021. Five hospitals admitted acute care patients (Mount Sinai Hospital, St. Michael's Hospital, Sunnybrook Health Sciences Centre, Toronto General Hospital, and Toronto Western Hospital). Two hospitals admitted rehabilitation and LTC residents (Baycrest Health Sciences and Providence Healthcare). Wave 1 of the pandemic occurred from March 11, 2020 to July 31, 2020. Wave 2 cases were included from August 1, 2020 to April 30, 2021 [15]. Research ethics approval was obtained through Clinical Trials Ontario (3186-OPIA-Apr/2020-38044).

## Inclusion criteria

1. Patients with COVID-19 infection confirmed by viral polymerase chain reaction (PCR) swab available on hospital health records.
2. Age  $\geq 65$  years when COVID-19 detected.

## Exclusion criteria

1. Re-admission to hospital after index admission for COVID-19. Only records from the initial admission were included.
2. False positive swab as defined by the infection control or treatment team assessment and removal of isolation precautions.
3. Recovered COVID-19 infection as defined by infection control or treatment team assessment and removal of isolation precautions.

Characteristics and treatment differences in hospitalized older adults with COVID-19 during waves 1 and 2: a multicentre case series

We only included the acute care admission if patients were diagnosed with COVID-19 at a rehabilitation or LTC home but later transferred to acute care for COVID-19. If patients were diagnosed with COVID-19 in acute care and later transferred to rehabilitation or LTC home, we only included the acute care stay.

Data collection and processing

Patients meeting inclusion criteria were identified by decision support at each site. A trained chart assessor abstracted data using case report forms hosted on a REDCap database. Each chart assessor was trained by a physician investigator at the hospital site (BL, JW, EW, KP, TI, and AV). The first five charts were extracted in duplicate with the physician investigator, and the physician investigator reviewed additional charts when the chart assessor had questions.

Missing or erroneous data (e.g. dates that were outside of the study range or temperatures that were outside of physiologic range) were reviewed by the site physician investigator. Missing CFS was imputed as 6 (severe frailty) for LTC residents and 5 (moderate frailty) for retirement home residents based on local LTC admission criteria and published frailty estimates [16,17].

A protocol is available on Open Science Framework (<https://osf.io/k4g7a/>). Please see Supplementary appendix 1 for details of data collection and processing.

Analysis

The acute care and rehabilitation/LTC patients were analysed separately. Patient characteristics and outcomes were analysed descriptively with counts (proportions), means (standard deviation) and medians (interquartile range), where appropriate. Statistical tests were used to compare data, including chi-squared test (categorical variables), ANOVA test (continuous variables), and Kruskal-Wallis test (non-normal variables). A multivariable logistic

Characteristics and treatment differences in hospitalized older adults with COVID-19 during waves 1 and 2: a multicentre case series

regression model was used to identify the independent association of dexamethasone use with delirium. Missing data in the model were handled by listwise deletion. Statistical significance was defined at  $p < 0.05$ . Model variables were tested for multicollinearity, fit was tested using the Hosmer-Lemeshow test and discrimination was tested using the c-statistic. The analysis was done in R version 4.0.3 [18].

## Reporting standard

The Consensus-based Clinical Case Reporting Guideline (CARE) was used for reporting this case series [19].

## Results

### Acute care hospitals

In the 927 patients admitted to an acute care hospital during both waves (Table 1), the median age was 79.0 years (interquartile range, IQR, 72.0–78.0) and 417 (45.0%) were female. Compared to the first COVID-19 wave ( $n=296$ ), patients admitted in wave 2 ( $n=631$ ) were older (median age 80.0 vs. 78.0 years,  $p=0.016$ ) and fewer were from LTC (15.7% vs. 25.3%,  $p=0.001$ ). There were no differences in the proportion with impairment in activities of daily living. A similar proportion of patients were frail as defined by  $CFS \geq 5$  in both waves (61.9% vs. 61.9%).

In the acute care cohort during both waves, dementia was present in 212 patients (23.1%) and 132 had a history of falls (14.3%). Baseline comorbidities were not significantly different between waves 1 and 2 except for fewer patients with a history of falls (12.4% vs. 18.3%,  $p=0.023$ ) and strokes (16.4% vs. 22.9%,  $p=0.024$ ) in wave 2. A larger proportion of patients

Characteristics and treatment differences in hospitalized older adults with COVID-19 during waves 1 and 2: a multicentre case series

indicated full resuscitation at baseline in wave 2 (58.5% vs. 49.6%,  $p=0.001$ ) and a smaller proportion indicated do not resuscitate in wave 2 (38.2% vs. 42.5%). On presentation, more patients had an infiltrate on chest x-ray in wave 2 (73.6% vs. 66.3%,  $p=0.030$ ).

Treatment and outcome differences in waves 1 and 2

Significantly more patients received dexamethasone (71.5% vs. 3.0% ,  $p<0.001$ ), remdesivir (15.7% vs. 0%,  $p<0.001$ ), and tocilizumab (3.8% vs. 0.3%,  $p=0.005$ ) in wave 2 than wave 1. No patients received hydroxychloroquine and lopinavir/ritonavir in wave 2. More patients were enrolled in clinical trials in wave 2 (11.7% vs. 5.1% in wave 1,  $p=0.003$ ).

There was no difference in the proportion of in-hospital deaths between the two waves (28.9% in wave 2 vs. 27.3% in wave 1,  $p=0.693$ ). Delirium prevalence, delirium incidence, hospital complications and ICU admissions were similar between waves 1 and 2 (Table 2). The median length of stay was reduced in wave 2 (10.0 days [IQR 6.0–19.0] vs. 13.0 days [IQR 5.0–25.3],  $p=0.034$ ).

Delirium characteristics between waves 1 and 2

Patients with delirium in wave 2 were older (median age 84.0, IQR 74.0–90.0, vs. 80.0, IQR 74.0–87.0,  $p=0.005$ ), and more likely to have delirium onset in hospital (32.5% vs. 21.3% in wave 1,  $p<0.001$ ). Agitation was more common in wave 2 (61.4% vs. 48.5% in wave 1,  $p=0.008$ ). There were more in-person essential care visitors in wave 2 (23.5% vs. 14.7% in wave 1,  $p=0.035$ ).

Characteristics and treatment differences in hospitalized older adults with COVID-19 during waves 1 and 2: a multicentre case series

## 106 Characteristics and outcomes associated with the use of dexamethasone, remdesivir 107 and tocilizumab in wave 2

108 We analyzed patient characteristics and outcomes associated with the use of  
109 dexamethasone, remdesivir and tocilizumab only in the wave 2 cohort (Table 4). Patients who  
110 received dexamethasone had similar age, frailty and cognitive status as those who did not get the  
111 drug. Fewer females received drug treatment (42.9% vs. 54.4%,  $p=0.011$ ). Patients who received  
112 dexamethasone were more likely to have a fever (53.0% vs. 33.3%) and had higher mean CRP  
113 levels (109.32 vs. 45.15mg/L). Dexamethasone use was associated with higher in-hospital  
114 mortality (37.3% vs. 7.4%,  $p<0.001$ ), longer length of stay (11.0 vs. 7.0 days,  $p<0.001$ ),  
115 increased ICU admissions (28.6% vs. 11.3%,  $<0.001$ ), increased delirium prevalence (59.2% vs.  
116 37.9%,  $p<0.001$ ) and increased restraint use (24.2% vs. 9.4%,  $p<0.001$ ). In a supplementary  
117 analysis using the entire cohort (waves 1 and 2), dexamethasone had a similar association with  
118 these outcomes (Supplementary table 1). Remdesivir and tocilizumab were not associated with  
119 differences in mortality, length of stay, delirium, or restraint use in wave 2. However, both drugs  
120 were given to younger, less frail patients with fewer comorbidities (Table 4).

## 121 Dexamethasone and delirium in wave 2

122 Although dexamethasone was associated with increased delirium prevalence, the  
123 association with delirium incidence was not statistically significant (22.9% vs. 16.6%,  $p=0.103$ ).  
124 In a multivariable model (Supplementary table 2), dexamethasone use was not associated with  
125 delirium incidence in wave 2 (adjusted odds ratio, aOR, 1.18, 95% CI 0.73–1.95) after adjusting  
126 for age (aOR 1.14 for every 5 years increase, 95% CI 1.01–1.29), dementia (aOR 1.40, 95% CI

Characteristics and treatment differences in hospitalized older adults with COVID-19 during waves 1 and 2: a multicentre case series

0.84–2.33), ICU admission (aOR 3.11, 95% CI 1.93–5.02), and clinical frailty scale (1.12, 95% CI 0.95–1.34).

### Rehabilitation hospitals and LTC homes

In the two facilities that provided rehabilitation and LTC services, there were 19 patients in wave 1 and 96 patients in wave 2 (Supplementary table 3). At baseline, patients in these facilities were older compared with those in acute care (median age 86.0 vs. 79.0 in acute care,  $p<0.001$ ) and there was a higher proportion of females (62.6% vs. 45.0% in acute care,  $p=0.001$ ). They were also more frail and more likely to have dementia and falls (Supplementary table 3). Comparing between the two waves, there were no significant differences in characteristics or outcomes. The proportion of deaths were smaller in wave 2, but this was not statistically significant (21.9% vs. 36.8% in wave 1,  $p=0.273$ ). The main difference in treatment was the administration of dexamethasone in these facilities during wave 2 (26.0% vs. 0% in wave 1,  $p=0.027$ ). Dexamethasone was used in 7 patients (13.2%) in LTC and in 18 patients (41.9%) in rehabilitation setting. The prevalence of delirium was low (15.8% in wave 1 and 14.6% in wave 2,  $p=0.998$ ) and there was no documented restraint use in both waves.

### Discussion

This multicentre case series of older patients admitted to hospital with COVID-19 highlighted differences in the patient population, treatment and outcomes between waves 1 and 2 of the pandemic. To our knowledge, this is the first study comparing the characteristics of older adults admitted with COVID-19 between the first two waves of the pandemic in Canada. The proportion of in-hospital deaths, delirium and complications were similar between the two waves

Characteristics and treatment differences in hospitalized older adults with COVID-19 during waves 1 and 2: a multicentre case series

despite more effective and available drugs. This finding is in agreement with published studies comparing survival of ICU patients in waves 1 and 2 in Europe, where an improvement in survival was not seen [20,21]. In our study, the length of stay was reduced in wave 2, which was not a reported benefit in the randomized trials of corticosteroids in COVID-19 [11].

Complicating wave 2 of the pandemic was the rise of SARS-CoV-2 variants [22]. In Ontario, Canada, the prevalence of variants increased from 15% of all cases in early February 2021 to nearly 90% in April 2021 [7]. Variant data was not captured in our study because researchers were not allowed to access the external health portal where variant sequencing results were hosted. Given the rise of variants in the province, we assumed that most patients in wave 2 were infected with a variant. The increased virulence of the variants [22] may explain the lack of improvement in mortality in the second wave, despite the prevalent use of disease modifying drugs (e.g. 71% on dexamethasone). Another explanation for the lack of mortality improvement in wave 2 may be related to the efficacy of the drugs in older adults. A systematic review of steroid trials in COVID-19 patients showed that the median age of trial participants ranged from 57–67, with few patients aged >80 years [11]. In contrast, the median age in our wave 2 cohort was 80 years (IQR 72–88). In the absence of randomized data, an observational study in France (n=267) showed improved survival for patients age >80 years on corticosteroids (hazard ratio 0.67, 95% confidence interval 0.46–0.99). This study was done between March and April 2020, when the wild type strain was circulating. The benefits were potentially attenuated with the variants.

Our study revealed a 3-day reduction in length of stay during wave 2 in acute care patients. Canadian data from January to November 2020 demonstrated a mean length of stay of 15 days. Wave 2 was associated with an increase in ICU length of stay in Ontario, but the

1 Characteristics and treatment differences in hospitalized older adults with COVID-19 during  
2 waves 1 and 2: a multicentre case series  
3  
4 171 majority of admitted patients were between ages 40–79 years [23]. The reduction in length of  
5  
6 172 stay may be reflective of better recovery time in non-ICU patients with the use of effective  
7  
8 173 drugs. Trials and observational studies of corticosteroids have not reported a reduction in length  
9  
10 174 of stay [11,24], but remdesivir was shown to improve time to recovery [12]. However, only  
11  
12 175 15.7% of patients received remdesivir in our study, suggesting that other medications (e.g.  
13  
14 176 steroids or tocilizumab [13]) or interventions (e.g. proning [25]) likely played an important role.  
15  
16  
17 177 Perhaps dexamethasone was more effective in a subgroup of older adults who were less sick,  
18  
19 178 which shortened time to discharge. We found that remdesivir and tocilizumab were given  
20  
21 179 preferentially to younger, less frail patients, which may indicate inequity in the distribution of  
22  
23  
24 180 therapeutic medications.

25  
26 181 Steroid use has been reported to increase delirium risk in the ICU literature [26]. Our data  
27  
28 182 showed that dexamethasone use was associated with increased delirium prevalence but not  
29  
30 183 incidence. The strength of the association with delirium incidence was reduced after adjusting for  
31  
32  
33 184 covariates. Our data suggest that dexamethasone use was not independently associated with  
34  
35 185 increased delirium risk, but patients who received dexamethasone likely had increased disease  
36  
37 186 severity, which was associated with delirium. It is possible that dexamethasone was associated  
38  
39 187 with increased delirium severity, but this was not assessed in our study. There was a 2.6-fold  
40  
41 188 increase in physical restraint use in patients given dexamethasone, which may suggest increased  
42  
43  
44 189 delirium severity [27].

45  
46  
47 190 There are some limitations to our data. First, we used a retrospective design, so we could  
48  
49 191 not prospectively collect frailty, delirium, and functional status data. Second, we did not capture  
50  
51 192 COVID-19 variants because not all hospitals had access to public health variant sequencing  
52  
53  
54 193 results. Third, we did not ascertain whether delirium onset occurred before or after

Characteristics and treatment differences in hospitalized older adults with COVID-19 during waves 1 and 2: a multicentre case series

dexamethasone use because the study was designed before there was widespread dexamethasone use. Fourth, we did not assess the dosages or clinical context when COVID-19 drugs were given. Fifth, we did not collect other demographic characteristics such as gender, race, language, and socioeconomic status.

There are several strengths to our study. It was large and included hospitalized older adults since the beginning of the pandemic in multiple hospitals in Toronto, Canada. Every acute care hospital used an electronic medical record system where pertinent data were readily available.

## Conclusion

Despite better therapeutic drugs, older adults hospitalized with COVID-19 did not have improved mortality or delirium risk in the second wave, but length of stay was shorter. Future research should explore ways to improve the outcomes of hospitalized older adults during pandemics.

References

[1] Liu X, Huang J, Li C, Zhao Y, Wang D, Huang Z, et al. The role of seasonality in the spread of COVID-19 pandemic. *Environ Res* 2021;195:110874. doi:10.1016/j.envres.2021.110874.

[2] Health Ontario P. Evidence on Public Health Measures Required for Rapid Control of Variants of Concern. 2021.

[3] Luring AS, Hodcroft EB. Genetic Variants of SARS-CoV-2 - What Do They Mean? *JAMA - J Am Med Assoc* 2021;325:529–31. doi:10.1001/jama.2020.27124.

[4] Welsh M, Rubin J, Ferguson R. Nearly 80 seniors’ homes across Ontario are reporting cases of COVID-19: expert | The Star. *Tor Star* 2020.

[5] City of Toronto. COVID-19: Status of Cases in Toronto – City of Toronto. City Toronto 2020. <https://www.toronto.ca/home/covid-19/media-room/covid-19-status-of-cases-in-toronto/> (accessed April 6, 2020).

[6] Vogel L. Is Canada ready for the second wave of COVID-19? *CMAJ* 2020;192:E664–5. doi:10.1503/cmaj.1095875.

[7] Public Health Ontario. COVID-19 in Ontario: January 15, 2020 to June 14, 2021. Toronto: 2021.

[8] Izda V, Jeffries MA, Sawalha AH. COVID-19: A review of therapeutic strategies and vaccine candidates. *Clin Immunol* 2021;222:108634. doi:10.1016/j.clim.2020.108634.

[9] Brown KA, Stall NM, Vanniyasingam T, Buchan SA, Daneman N, Hillmer MP, et al. Early Impact of Ontario’s COVID-19 Vaccine Rollout on Long-Term Care Home Residents and Health Care Workers. 2021. doi:10.47326/ocsat.2021.02.13.1.0.

[10] Public Health Ontario. COVID-19 Vaccine Uptake and Program Impact. Toronto: 2021.

[11] Sterne JAC, Murthy S, Diaz J V., Slutsky AS, Villar J, Angus DC, et al. Association between Administration of Systemic Corticosteroids and Mortality among Critically Ill Patients with COVID-19: A Meta-analysis. *JAMA - J Am Med Assoc* 2020;324:1330–41. doi:10.1001/jama.2020.17023.

[12] Kaka AS, MacDonald R, Greer N, Vela K, Duan-Porter W, Obley A, et al. Major Update: Remdesivir for Adults With COVID-19. *Ann Intern Med* 2021;174:663–72. doi:10.7326/m20-8148.

[13] Khan FA, Stewart I, Fabbri L, Moss S, Robinson K, Smyth AR, et al. Systematic review and meta-analysis of anakinra, sarilumab, siltuximab and tocilizumab for COVID-19. *Thorax* 2021:thoraxjnl-2020-215266. doi:10.1136/thoraxjnl-2020-215266.

[14] Prescott HC, Rice TW. Corticosteroids in COVID-19 ARDS: Evidence and Hope during the Pandemic. *JAMA - J Am Med Assoc* 2020;324:1292–5. doi:10.1001/jama.2020.16747.

[15] City of Toronto. COVID-19: Case Counts. City Toronto 2021. <https://www.toronto.ca/home/covid-19/covid-19-latest-city-of-toronto-news/covid-19-pandemic-data/covid-19-weekday-status-of-cases-data/> (accessed June 22, 2021).

[16] Muscedere J, Andrew MK, Bagshaw SM, Estabrooks C, Hogan D, Holroyd-Leduc J, et al. Screening for Frailty in Canada’s Health Care System: A Time for Action. *Can J Aging* 2016;35:281–97. doi:10.1017/S0714980816000301.

[17] Government of Ontario. Long-term care overview | Ontario.ca. OntarioCa n.d.

# Characteristics and treatment differences in hospitalized older adults with COVID-19 during waves 1 and 2: a multicentre case series

- 251 <https://www.ontario.ca/page/about-long-term-care> (accessed April 4, 2021).
- 252 [18] R Core Team. R: A language and environment for statistical computing 2014.
- 253 [19] Gagnier JJ, Kienle G, Altman DG, Moher D, Sox H, Riley D, et al. The CARE guidelines:  
254 Consensus-based clinical case report guideline development. *J Clin Epidemiol*  
255 2014;67:46–51. doi:10.1016/j.jclinepi.2013.08.003.
- 256 [20] Karagiannidis C, Windisch W, McAuley DF, Welte T, Busse R. Major differences in ICU  
257 admissions during the first and second COVID-19 wave in Germany. *Lancet Respir Med*  
258 2021;9:e47–8. doi:10.1016/s2213-2600(21)00101-6.
- 259 [21] Contou D, Fraissé M, Pajot O, Tirolien JA, Mentec H, Plantefève G. Comparison between  
260 first and second wave among critically ill COVID-19 patients admitted to a French ICU:  
261 no prognostic improvement during the second wave? *Crit Care* 2021;25:1–4.  
262 doi:10.1186/s13054-020-03449-6.
- 263 [22] Abdool Karim SS, de Oliveira T. New SARS-CoV-2 Variants — Clinical, Public Health,  
264 and Vaccine Implications. *N Engl J Med* 2021;384:1866–8. doi:10.1056/nejmc2100362.
- 265 [23] Howlett K, Grant K. COVID-19 patients in Ontario spending longer in ICU - The Globe  
266 and Mail. *Globe Mail* 2021. [https://www.theglobeandmail.com/canada/article-covid-19-](https://www.theglobeandmail.com/canada/article-covid-19-patients-in-ontario-spending-longer-in-icu/)  
267 [patients-in-ontario-spending-longer-in-icu/](https://www.theglobeandmail.com/canada/article-covid-19-patients-in-ontario-spending-longer-in-icu/) (accessed June 15, 2021).
- 268 [24] Gallay L, Tran V-T, Perrodeau E, Vignier N, Mahevas M, Bisio F, et al. Fourteen-day  
269 survival among older adults with severe infection with severe acute respiratory syndrome  
270 coronavirus 2 treated with corticosteroid: a cohort study. *Clin Microbiol Infect* 2021.  
271 doi:10.1016/j.cmi.2021.03.021.
- 272 [25] Ponnappa Reddy M, Subramaniam A, Afroz A, Billah B, Lim ZJ, Zubarev A, et al. Prone  
273 Positioning of Nonintubated Patients With Coronavirus Disease 2019-A Systematic  
274 Review and Meta-Analysis. *Crit Care Med* 2021;Publish Ah.  
275 doi:10.1097/CCM.0000000000005086.
- 276 [26] Schreiber MP, Colantuoni E, Bienvenu OJ, Neufeld KJ, Chen KF, Shanholtz C, et al.  
277 Corticosteroids and transition to delirium in patients with acute lung injury. *Crit Care Med*  
278 2014;42:1480–6. doi:10.1097/CCM.0000000000000247.
- 279 [27] Farzanegan B, Elkhatib THM, Elgazzar AE, Moghaddam KG, Torkaman M, Zarkesh M,  
280 et al. Impact of Religiosity on Delirium Severity Among Critically Ill Shi'a Muslims: A  
281 Prospective Multi-Center Observational Study. *J Relig Health* 2021;60:816–40.  
282 doi:10.1007/s10943-019-00895-7.

Table 1: Baseline characteristics of older adults aged  $\geq 65$  admitted to acute care hospital with COVID-19 in waves 1 and 2.

|                                                                  | Cohort           | Wave 1           | Wave 2           | p-value |
|------------------------------------------------------------------|------------------|------------------|------------------|---------|
| n (%)                                                            | 927 (100)        | 296 (31.9)       | 631 (68.1)       |         |
| Age, median (IQR)                                                | 79.0 (72.0–87.0) | 78.0 (71.0–85.0) | 80.0 (72.0–88.0) | 0.016   |
| Female, n (%)                                                    | 417 (45.0)       | 126 (42.6)       | 291 (46.2)       | 0.336   |
| From long-term care, n (%)                                       | 174 (18.8)       | 75 (25.3)        | 99 (15.7)        | 0.001   |
| Any impairment in activities of daily living, n (%)              | 359 (38.7)       | 110 (37.2)       | 249 (39.5)       | 0.550   |
| Any impairment in instrumental activities of daily living, n (%) | 497 (53.6)       | 137 (46.3)       | 360 (57.1)       | 0.003   |
| Clinical frailty scale, mean (SD)                                | 4.95 (1.55)      | 5.10 (1.61)      | 4.88 (1.51)      | 0.053   |
| Frail (CFS $\geq 5$ ), n (%)                                     | 552 (61.9)       | 174 (61.9)       | 378 (61.9)       | 1       |
| Baseline mobility, n (%)                                         |                  |                  |                  | <0.001  |
| Walks independently                                              | 371 (41.0)       | 91 (31.6)        | 280 (45.4)       |         |
| Walks with cane                                                  | 56 (6.2)         | 19 (6.6)         | 37 (6.0)         |         |
| Walks with walker                                                | 245 (27.1)       | 78 (27.1)        | 167 (27.1)       |         |
| Wheelchair                                                       | 90 (9.9)         | 32 (11.1)        | 58 (9.4)         |         |
| Bedbound                                                         | 44 (4.9)         | 15 (5.2)         | 29 (4.7)         |         |
| Undocumented                                                     | 99 (10.9)        | 53 (18.4)        | 46 (7.5)         |         |
| Baseline code status, n (%)                                      |                  |                  |                  | 0.001   |
| Full code                                                        | 463 (55.6)       | 132 (49.6)       | 331 (58.5)       |         |
| Do not resuscitate                                               | 329 (39.5)       | 113 (42.5)       | 216 (38.2)       |         |
| Only intubation                                                  | 21 (2.5)         | 13 (4.9)         | 8 (1.4)          |         |
| Other option                                                     | 8 (1.0)          | 6 (2.3)          | 2 (0.4)          |         |
| Undocumented                                                     | 11 (1.3)         | 2 (0.8)          | 9 (1.6)          |         |
| Comorbidities, n (%)                                             |                  |                  |                  |         |
| Dementia                                                         | 212 (23.1)       | 64 (21.8)        | 148 (23.8)       | 0.560   |
| Falls                                                            | 132 (14.3)       | 54 (18.3)        | 78 (12.4)        | 0.023   |
| Heart failure                                                    | 131 (14.2)       | 48 (16.3)        | 83 (13.2)        | 0.250   |
| Coronary artery disease                                          | 220 (23.9)       | 78 (26.5)        | 142 (22.6)       | 0.228   |
| Chronic kidney disease                                           | 189 (20.5)       | 62 (21.1)        | 127 (20.2)       | 0.829   |
| Stroke                                                           | 170 (18.5)       | 67 (22.9)        | 103 (16.4)       | 0.024   |
| Hypertension                                                     | 637 (69.0)       | 212 (71.9)       | 425 (67.7)       | 0.227   |
| Diabetes                                                         | 369 (40.0)       | 125 (42.5)       | 244 (38.9)       | 0.324   |
| Chronic obstructive pulmonary disease                            | 112 (12.2)       | 43 (14.6)        | 69 (11.0)        | 0.147   |
| Cancer                                                           | 217 (23.6)       | 65 (22.2)        | 152 (24.2)       | 0.547   |
| Presenting characteristics                                       |                  |                  |                  |         |
| Any infiltrate on chest x-ray, n (%)                             | 632 (71.3)       | 191 (66.3)       | 441 (73.6)       | 0.030   |
| Maximum temperature (°C) on presentation, median (IQR)           | 37.7 (37.0–38.4) | 37.9 (37.0–38.7) | 37.6 (37.0–38.4) | 0.050   |
| Days from prodromal symptoms to COVID-19 diagnosis, median (IQR) | 3.0 (1.0–7.0)    | 4.0 (1.8–7.0)    | 3.0 (0.5–7.0)    | 0.004   |

IQR = interquartile range; SD = standard deviation; CFS = clinical frailty scale.

Table 2: Outcomes and treatment of older adults aged  $\geq 65$  admitted to acute care hospital with COVID-19 in waves 1 and 2.

|                                        | Cohort          | Wave 1          | Wave 2          | p-value |
|----------------------------------------|-----------------|-----------------|-----------------|---------|
| n (%)                                  | 927 (100)       | 296 (31.9)      | 631 (68.1)      |         |
| COVID-19 treatment, n (%)              |                 |                 |                 |         |
| Dexamethasone                          | 460 (49.6)      | 9 (3.0)         | 451 (71.5)      | <0.001  |
| Azithromycin                           | 203 (21.9)      | 70 (23.6)       | 133 (21.1)      | 0.425   |
| Remdesivir                             | 99 (10.7)       | 0 (0.0)         | 99 (15.7)       | <0.001  |
| Other steroid                          | 56 (6.0)        | 21 (7.1)        | 35 (5.5)        | 0.439   |
| Tocilizumab                            | 25 (2.7)        | 1 (0.3)         | 24 (3.8)        | 0.005   |
| Convalescent plasma                    | 18 (1.9)        | 1 (0.3)         | 17 (2.7)        | 0.03    |
| Lopinavir/ritonavir                    | 6 (0.6)         | 6 (2.0)         | 0 (0.0)         | 0.002   |
| Hydroxychloroquine                     | 4 (0.4)         | 4 (1.4)         | 0 (0.0)         | 0.017   |
| Participation in clinical trial, n (%) | 80 (9.2)        | 15 (5.1)        | 56 (11.7)       | 0.003   |
| Surgery in hospital, n (%)             | 44 (5.0)        | 19 (6.4)        | 24 (5.0)        | 0.496   |
| Outcomes                               |                 |                 |                 |         |
| In-hospital death, n (%)               | 262 (28.4)      | 81 (27.4)       | 181 (28.9)      | 0.693   |
| Length of stay, median (IQR)           | 11.0 (6.0–22.0) | 13.0 (5.0–25.3) | 10.0 (6.0–19.0) | 0.034   |
| Delirium prevalence, n (%)             | 497 (54.1)      | 165 (55.7)      | 332 (53.3)      | 0.531   |
| Delirium incidence, n (%)              | 201 (21.8)      | 69 (23.3)       | 132 (21.1)      | 0.505   |
| ICU admission, n (%)                   | 215 (23.4)      | 67 (22.8)       | 148 (23.7)      | 0.831   |
| Any complications, n (%)               | 432 (46.6)      | 135 (45.6)      | 297 (47.1)      | 0.730   |
| Complications, n (%)                   |                 |                 |                 |         |
| Physical restraint use                 | 189 (20.4)      | 63 (21.3)       | 126 (20.0)      | 0.707   |
| Respiratory failure                    | 154 (16.6)      | 43 (14.5)       | 111 (17.6)      | 0.283   |
| Acute respiratory distress syndrome    | 101 (10.9)      | 25 (8.4)        | 76 (12.0)       | 0.127   |
| Other infection                        | 68 (7.3)        | 19 (6.4)        | 49 (7.8)        | 0.550   |
| Aspiration                             | 59 (6.4)        | 14 (4.7)        | 45 (7.1)        | 0.210   |
| Hospital-acquired pneumonia            | 45 (4.9)        | 20 (6.8)        | 25 (4.0)        | 0.093   |
| In-hospital fall                       | 45 (4.9)        | 11 (3.7)        | 34 (5.4)        | 0.347   |
| Stroke                                 | 22 (2.4)        | 11 (3.7)        | 11 (1.7)        | 0.108   |
| Pulmonary embolism                     | 20 (2.2)        | 4 (1.4)         | 16 (2.5)        | 0.360   |
| Heart failure                          | 19 (2.0)        | 7 (2.4)         | 12 (1.9)        | 0.829   |
| Myocardial infarction                  | 18 (1.9)        | 7 (2.4)         | 11 (1.7)        | 0.701   |
| Deep venous thrombosis                 | 9 (1.0)         | 3 (1.0)         | 6 (1.0)         | 1       |

ICU = intensive care unit.

Table 3: Delirium characteristics of older adults aged  $\geq 65$  admitted to acute care hospital with COVID-19 in waves 1 and 2.

|                                                                                              | Cohort           | Wave 1           | Wave 2           | p-value |
|----------------------------------------------------------------------------------------------|------------------|------------------|------------------|---------|
| n (%)                                                                                        | 497 (100)        | 165 (33.2)       | 332 (66.8)       |         |
| Age, median (IQR)                                                                            | 82.0 (74.0–89.0) | 80.0 (74.0–87.0) | 84.0 (74.0–90.0) | 0.005   |
| Female, n (%)                                                                                | 220 (44.3)       | 74 (44.8)        | 146 (44.0)       | 0.929   |
| Location of delirium onset, n (%)                                                            |                  |                  |                  | <0.001  |
| Home                                                                                         | 121 (24.4)       | 38 (23.2)        | 83 (25.0)        |         |
| Long-term care                                                                               | 110 (22.2)       | 40 (24.4)        | 70 (21.1)        |         |
| Emergency department                                                                         | 33 (6.7)         | 15 (9.1)         | 18 (5.4)         |         |
| Ward                                                                                         | 143 (28.8)       | 35 (21.3)        | 108 (32.5)       |         |
| ICU                                                                                          | 70 (14.1)        | 22 (13.4)        | 48 (14.5)        |         |
| Rehabilitation                                                                               | 14 (2.8)         | 12 (7.3)         | 2 (0.6)          |         |
| Unknown                                                                                      | 5 (1.0)          | 2 (1.2)          | 3 (0.9)          |         |
| History of behavioural and psychological symptoms of dementia, n (%)                         | 110 (22.4)       | 58 (36.5)        | 52 (15.7)        | <0.001  |
| Motor subtype, n (%)                                                                         |                  |                  |                  | 0.867   |
| Hyperactive                                                                                  | 142 (28.9)       | 43 (26.9)        | 99 (29.9)        |         |
| Hypoactive                                                                                   | 182 (37.1)       | 62 (38.8)        | 120 (36.3)       |         |
| Mixed                                                                                        | 83 (16.9)        | 26 (16.2)        | 57 (17.2)        |         |
| No subtype                                                                                   | 84 (17.1)        | 29 (18.1)        | 55 (16.6)        |         |
| Evidence of agitation, n (%)                                                                 | 283 (57.2)       | 79 (48.5)        | 204 (61.4)       | 0.008   |
| Use of restraints, n (%)                                                                     | 184 (37.0)       | 63 (38.2)        | 121 (36.4)       | 0.780   |
| Use of antipsychotics, n (%)                                                                 | 266 (54.2)       | 80 (49.7)        | 186 (56.4)       | 0.195   |
| Use of any sedating medication, n (%)*                                                       | 335 (69.5)       | 104 (65.8)       | 231 (71.3)       | 0.263   |
| Use of benzodiazepines, n (%)                                                                | 154 (31.2)       | 49 (30.1)        | 105 (31.8)       | 0.770   |
| Presence of family or caregivers in person, n (%)                                            | 101 (20.7)       | 23 (14.7)        | 78 (23.5)        | 0.035   |
| Use of virtual technology for family or caregivers who could not be present in person, n (%) | 278 (57.6)       | 94 (61.8)        | 184 (55.6)       | 0.233   |

IQR = interquartile range; ICU = intensive care unit.

Table 4: Characteristics and outcomes associated with the use of dexamethasone, remdesivir, and tocilizumab in acute care patients during wave 2.

|                              | No Dexamethasone | Dexamethasone    | No remdesivir    | Remdesivir        | No tocilizumab   | Tocilizumab       |
|------------------------------|------------------|------------------|------------------|-------------------|------------------|-------------------|
| n (%)                        | 180 (28.5)       | 451 (71.5)       | 532 (84.3)       | 99 (15.7)         | 607 (96.2)       | 24 (3.8)          |
| Characteristics              |                  |                  |                  |                   |                  |                   |
| Age, median (IQR)            | 79.0 (71.0–86.0) | 80.0 (72.0–88.0) | 81.0 (72.0–88.0) | 75.0 (69.5–84.5)* | 80.0 (72.0–88.0) | 73.5 (70.0–81.0)* |
| Female, n (%)                | 98 (54.4)        | 193 (42.9)*      | 253 (47.6)       | 38 (38.4)         | 281 (46.4)       | 10 (41.7)         |
| Frailty†, n (%)              | 104 (61.2)       | 274 (62.1)       | 339 (66.1)       | 39 (39.8)*        | 371 (63.0)       | 7 (31.8)*         |
| Dementia, n (%)              | 42 (23.6)        | 106 (23.8)       | 137 (26.1)       | 11 (11.1)*        | 147 (24.5)       | 1 (4.2)*          |
| CXR infiltrates, n (%)       | 87 (52.7)        | 354 (81.6)*      | 361 (71.5)       | 80 (85.1)*        | 425 (73.7)       | 16 (72.7)         |
| Fever, n (%)                 | 60 (33.3)        | 239 (53.0)*      | 242 (45.5)       | 57 (57.6)*        | 281 (46.3)       | 18 (75.0)*        |
| CRP, mean (SD)               | 45.15 (55.86)    | 109.32 (81.25)*  | 94.93 (83.77)    | 93.51 (70.46)     | 90.72 (80.17)    | 150.88 (68.78)*   |
| Outcomes                     |                  |                  |                  |                   |                  |                   |
| In-hospital death, n (%)     | 13 (7.4)         | 168 (37.3)*      | 155 (29.4)       | 26 (26.3)         | 172 (28.5)       | 9 (37.5)          |
| Length of stay, median (IQR) | 7.0 (3.0–14.0)   | 11.0 (7.0–21.0)* | 10.0 (5.0–19.0)  | 11.0 (7.0–22.0)   | 10.0 (6.0–19.0)  | 14.0 (7.8–20.0)   |
| Delirium prevalence, n (%)   | 66 (37.9)        | 266 (59.2)*      | 287 (54.8)       | 45 (45.5)         | 316 (52.8)       | 16 (66.7)         |
| Delirium incidence, n (%)    | 29 (16.6)        | 103 (22.9)       | 109 (20.7)       | 23 (23.2)         | 125 (20.8)       | 7 (29.2)          |
| ICU admission, n (%)         | 20 (11.3)        | 128 (28.6)*      | 128 (24.3)       | 20 (20.2)         | 134 (22.3)       | 14 (58.3)*        |
| Complications                |                  |                  |                  |                   |                  |                   |
| Restraint use, n (%)         | 17 (9.4)         | 109 (24.2)*      | 105 (19.7)       | 21 (21.2)         | 120 (19.8)       | 6 (25.0)          |
| Falls, n (%)                 | 12 (6.7)         | 22 (4.9)         | 31 (5.8)         | 3 (3.0)           | 33 (5.4)         | 1 (4.2)           |
| Respiratory failure, n (%)   | 7 (3.9)          | 104 (23.1)*      | 93 (17.5)        | 18 (18.2)         | 104 (17.1)       | 7 (29.2)          |
| ARDS, n (%)                  | 2 (1.1)          | 74 (16.4)*       | 63 (11.8)        | 13 (13.1)         | 70 (11.5)        | 6 (25.0)          |

\*p<0.05

†Frailty is defined as clinical frailty scale greater  $\geq 5$ .

IQR = interquartile range; CXR = chest x-ray; CRP = C-reactive protein in mg/L; ICU = intensive care unit.

Supplementary appendix 1

Data collection

Patients meeting inclusion criteria were identified by decision support at each site. A trained chart assessor abstracted data using case report forms hosted on a REDCap database. Each chart assessor was trained by a physician investigator at the hospital site (BL, JW, EW, KP, TI, and AV). The first five charts were extracted in duplicate with the physician investigator, and the physician investigator reviewed additional charts when the chart assessor had questions. Five physician investigators were geriatricians (BL, JW, EW, KP, and TI) and one was a family physician (AV). A protocol is available on Open Science Framework (<https://osf.io/k4g7a/>).

Patient characteristics were extracted from the chart, including age at diagnosis, date of diagnosis, sex (as documented on chart), baseline functional status, place of residence, clinical frailty scale (CFS) [1], and past medical history. Treatment for COVID-19 was recorded, including dexamethasone, remdesivir, tocilizumab, hydroxychloroquine, and antibiotics. Enrolment in COVID-19 clinical trials was documented. Delirium was assessed using a validated chart review tool [2] and we recorded whether delirium occurred on presentation to hospital (delirium prevalence) or during hospitalization (delirium incidence). If delirium was present, characteristics including predominant motor subtype, documentation of agitation, restraint use, and medication treatment were abstracted. Outcomes were recorded, including in-hospital mortality, intensive care unit (ICU) admission, length of stay, and in-hospital complications. Complications were defined as events associated with COVID-19 infection, such as venous thromboembolism, respiratory failure, and cardiovascular events [3]. We also recorded geriatric complications such as in-hospital falls and physical restraint use.

Data processing

Missing or erroneous data (e.g. dates that were outside of the study range or temperatures that were outside of physiologic range) were reviewed by the site physician investigator. Missing CFS was imputed as 6 (severe frailty) for LTC residents and 5 (moderate frailty) for retirement home residents based on local LTC admission criteria and published frailty estimates [4,5]. Missing frailty or functional data from community dwelling patients were estimated by the physician investigator based on available data. If relevant information was not documented in the chart, we did not impute missing frailty data from community dwelling patients because of the diverse range of frailty levels [6].

References

[1] Rockwood K, Song X, MacKnight C, Bergman H, Hogan DB, McDowell I, et al. A global clinical measure of fitness and frailty in elderly people. CMAJ 2005;173:489–95. doi:10.1503/cmaj.050051.

[2] Inouye SK, Leo-Summers L, Zhang Y, Bogardus ST, Leslie DL, Agostini J V. A chart-based method for identification of delirium: validation compared with interviewer ratings using the confusion assessment method. J Am Geriatr Soc 2005;53:312–8. doi:10.1111/j.1532-5415.2005.53120.x.

[3] Guan W, Ni Z, Hu Y, Liang W, Ou C, He J, et al. Clinical Characteristics of Coronavirus Disease 2019 in China. N Engl J Med 2020;NEJMoa2002032. doi:10.1056/NEJMoa2002032.

- 1  
2  
3 [4] Muscedere J, Andrew MK, Bagshaw SM, Estabrooks C, Hogan D, Holroyd-Leduc J, et al.  
4 Screening for Frailty in Canada's Health Care System: A Time for Action. *Can J Aging*  
5 2016;35:281–97. doi:10.1017/S0714980816000301.  
6  
7 [5] Government of Ontario. Long-term care overview | Ontario.ca. OntarioCa n.d.  
8 <https://www.ontario.ca/page/about-long-term-care> (accessed April 4, 2021).  
9  
10 [6] Kelly S, O'Brien I, Smuts K, O'Sullivan M, Warters A. Prevalence of frailty among  
11 community dwelling older adults in receipt of low level home support: a cross-sectional  
12 analysis of the North Dublin Cohort. *BMC Geriatr* 2017;17:121. doi:10.1186/s12877-017-  
13 0508-2.  
14  
15  
16  
17  
18  
19  
20  
21  
22  
23  
24  
25  
26  
27  
28  
29  
30  
31  
32  
33  
34  
35  
36  
37  
38  
39  
40  
41  
42  
43  
44  
45  
46  
47  
48  
49  
50  
51  
52  
53  
54  
55  
56  
57  
58  
59  
60

Confidential

Supplementary table 1: Analysis of dexamethasone’s association with various outcomes in the wave 2 vs. entire cohort (including wave 1). The findings were similar.

|                              | Wave 2 only      |                 |         | Waves 1 and 2    |                 |         |
|------------------------------|------------------|-----------------|---------|------------------|-----------------|---------|
|                              | No Dexamethasone | Dexamethasone   | P value | No Dexamethasone | Dexamethasone   | P value |
|                              | 180 (28.5)       | 451 (71.5)      |         | 467 (50.4)       | 460 (49.6)      |         |
| In-hospital death, n (%)     | 13 (7.4)         | 168 (37.3)      | <0.001  | 90 (19.4)        | 172 (37.4)      | <0.001  |
| Length of stay, median (IQR) | 7.0 (3.0–14.0)   | 11.0 (7.0–21.0) | <0.001  | 10.0 (4.0–22.0)  | 11.0 (7.0–21.0) | 0.006   |
| Delirium prevalence, n (%)   | 66 (37.9)        | 266 (59.2)      | <0.001  | 225 (48.8)       | 272 (59.4)      | 0.002   |
| Delirium incidence, n (%)    | 29 (16.6)        | 103 (22.9)      | 0.103   | 96 (20.8)        | 105 (22.9)      | 0.49    |
| ICU admission, n (%)         | 20 (11.3)        | 128 (28.6)      | <0.001  | 80 (17.3)        | 135 (29.5)      | <0.001  |

IQR = interquartile range; ICU = intensive care unit.

Supplementary table 2: Multivariable model of dexamethasone as main predictor of delirium incidence in older adults admitted to acute care hospitals with COVID-19 in wave 2.

| Variables                       | Unadjusted OR    | Adjusted OR      | P value |
|---------------------------------|------------------|------------------|---------|
| Dexamethasone use               | 1.49 (0.96–2.39) | 1.18 (0.73–1.95) | 0.502   |
| Age (each 5 year increase)      | 1.13 (1.02–1.26) | 1.14 (1.01–1.29) | 0.044   |
| Dementia                        | 1.63 (1.05–2.48) | 1.40 (0.84–2.33) | 0.201   |
| Clinical frailty scale          | 1.16 (1.02–1.32) | 1.12 (0.95–1.34) | 0.179   |
| ICU                             | 2.26 (1.48–3.44) | 3.11 (1.93–5.02) | <0.001  |
| Hosmer-Lemeshow test: $p=0.108$ |                  |                  |         |
| C-statistic: 0.675              |                  |                  |         |

OR = odds ratio; ICU = intensive care unit admission

Supplementary table 3: A comparison of waves 1 and 2 of COVID-19 patients admitted to rehabilitation or long-term care hospitals.

|                                                        | Cohort           | Wave 1           | Wave 2           | p-value |
|--------------------------------------------------------|------------------|------------------|------------------|---------|
| n (%)                                                  | 115 (100)        | 19 (16.5)        | 96 (82.5)        |         |
| Age, median (IQR)                                      | 86.0 (78.5–91.0) | 90.0 (85.5–92.0) | 85.5 (78.0–90.3) | 0.094   |
| Female, n (%)                                          | 72 (62.6)        | 11 (57.9)        | 61 (63.5)        | 0.837   |
| Rehabilitation hospital, n (%)                         | 44 (38.3)        | 1 (5.3)          | 43 (44.8)        | 0.001   |
| Long-term care, n (%)                                  | 71 (61.7)        | 18 (94.7)        | 53 (55.2)        | 0.001   |
| Clinical frailty scale, mean (SD)                      | 6.80 (1.17)      | 6.89 (1.33)      | 6.78 (1.14)      | 0.701   |
| Frail (CFS ≥5), n (%)                                  | 109 (94.8)       | 18 (94.7)        | 91 (94.8)        | 1       |
| Comorbidities, n (%)                                   |                  |                  |                  |         |
| Dementia                                               | 56 (48.7)        | 11 (57.9)        | 45 (46.9)        | 0.531   |
| Falls                                                  | 53 (46.9)        | 10 (52.6)        | 43 (45.7)        | 0.767   |
| Heart failure                                          | 17 (14.9)        | 1 (5.3)          | 16 (16.8)        | 0.347   |
| Coronary artery disease                                | 27 (23.7)        | 3 (15.8)         | 24 (25.3)        | 0.554   |
| Chronic kidney disease                                 | 13 (11.4)        | 1 (5.3)          | 12 (12.6)        | 0.598   |
| Stroke                                                 | 21 (18.4)        | 5 (26.3)         | 16 (16.8)        | 0.517   |
| Hypertension                                           | 68 (59.6)        | 14 (73.7)        | 54 (56.8)        | 0.267   |
| Diabetes                                               | 38 (33.3)        | 5 (26.3)         | 33 (34.7)        | 0.657   |
| Chronic obstructive pulmonary disease                  | 9 (7.9)          | 2 (10.5)         | 7 (7.4)          | 1       |
| Cancer                                                 | 25 (22.1)        | 7 (38.9)         | 18 (18.9)        | 0.119   |
| Presenting characteristics                             |                  |                  |                  |         |
| Any infiltrate on chest x-ray, n (%)                   | 7 (7.3)          | 0 (0.0)          | 7 (7.8)          | 1       |
| Maximum temperature (°C) on presentation, median (IQR) | 37.5 (36.9–38.0) | 37.7 (37.2–38.0) | 37.5 (36.9–38.0) | 0.72    |
| Outcomes, n (%)                                        |                  |                  |                  |         |
| Death                                                  | 28 (24.3)        | 7 (36.8)         | 21 (21.9)        | 0.273   |
| Delirium                                               | 17 (14.8)        | 3 (15.8)         | 14 (14.6)        | 1       |
| Any complications                                      | 44 (38.3)        | 4 (21.1)         | 40 (41.7)        | 0.152   |
| Complications                                          |                  |                  |                  |         |
| Fall                                                   | 19 (16.5)        | 2 (10.5)         | 17 (17.7)        | 0.666   |
| Pneumonia                                              | 16 (13.9)        | 0 (0.0)          | 16 (16.7)        | 0.12    |
| Aspiration                                             | 2 (1.7)          | 2 (10.5)         | 0 (0.0)          | 0.025   |
| Respiratory failure                                    | 8 (7.0)          | 1 (5.3)          | 7 (7.3)          | 1       |
| ARDS                                                   | 4 (3.5)          | 1 (5.3)          | 3 (3.1)          | 1       |
| Restraints                                             | 0 (0)            | 0 (0)            | 0 (0)            | 1       |
| Treatment                                              |                  |                  |                  |         |
| Dexamethasone                                          | 25 (21.7)        | 0 (0.0)          | 25 (26.0)        | 0.027   |
| Azithromycin                                           | 7 (6.1)          | 1 (5.3)          | 6 (6.2)          | 1       |
| Other antibiotics                                      | 16 (13.9)        | 1 (5.3)          | 15 (15.6)        | 0.407   |

IQR = interquartile range; SD = standard deviation; CFS = clinical frailty scale; ARDS = acute respiratory distress syndrome.

# CARE Checklist of information to include when writing a case report

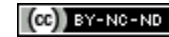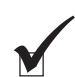

| Topic                               | Item       | Checklist item description                                                                             | Reported on Line                                                           |
|-------------------------------------|------------|--------------------------------------------------------------------------------------------------------|----------------------------------------------------------------------------|
| <b>Title</b>                        | <b>1</b>   | The diagnosis or intervention of primary focus followed by the words “case report”                     | <b>title page</b>                                                          |
| <b>Key Words</b>                    | <b>2</b>   | 2 to 5 key words that identify diagnoses or interventions in this case report, including "case report" | <b>title page</b>                                                          |
| <b>Abstract<br/>(no references)</b> | <b>3a</b>  | Introduction: What is unique about this case and what does it add to the scientific literature?        | <b>Abstract page</b>                                                       |
|                                     | <b>3b</b>  | Main symptoms and/or important clinical findings                                                       | <b>Abstract page</b>                                                       |
|                                     | <b>3c</b>  | The main diagnoses, therapeutic interventions, and outcomes                                            | <b>Abstract page</b>                                                       |
|                                     | <b>3d</b>  | Conclusion—What is the main “take-away” lesson(s) from this case?                                      | <b>Abstract page</b>                                                       |
| <b>Introduction</b>                 | <b>4</b>   | One or two paragraphs summarizing why this case is unique ( <b>may include references</b> )            | <b>Page 1, lines 2-17</b>                                                  |
| <b>Patient Information</b>          | <b>5a</b>  | De-identified patient specific information.                                                            | <b>Page 1, 17-19</b>                                                       |
|                                     | <b>5b</b>  | Primary concerns and symptoms of the patient.                                                          | <b>Page 2, 32-43</b>                                                       |
|                                     | <b>5c</b>  | Medical, family, and psycho-social history including relevant genetic information                      | <b>Page 2, 32-43</b>                                                       |
|                                     | <b>5d</b>  | Relevant past interventions with outcomes                                                              | <b>not applicable</b>                                                      |
| <b>Clinical Findings</b>            | <b>6</b>   | Describe significant physical examination (PE) and important clinical findings.                        | <b>Not applicable</b>                                                      |
| <b>Timeline</b>                     | <b>7</b>   | Historical and current information from this episode of care organized as a timeline                   | <b>not applicable</b>                                                      |
| <b>Diagnostic<br/>Assessment</b>    | <b>8a</b>  | Diagnostic testing (such as PE, laboratory testing, imaging, surveys).                                 | <b>Page 2, 32-43</b>                                                       |
|                                     | <b>8b</b>  | Diagnostic challenges (such as access to testing, financial, or cultural)                              | <b>Not applicable</b>                                                      |
|                                     | <b>8c</b>  | Diagnosis (including other diagnoses considered)                                                       | <b>Page 2, 32-43</b>                                                       |
|                                     | <b>8d</b>  | Prognosis (such as staging in oncology) where applicable                                               | <b>not applicable</b>                                                      |
| <b>Therapeutic<br/>Intervention</b> | <b>9a</b>  | Types of therapeutic intervention (such as pharmacologic, surgical, preventive, self-care)             | <b>Page 5, 90-112</b>                                                      |
|                                     | <b>9b</b>  | Administration of therapeutic intervention (such as dosage, strength, duration)                        | <b>Page 5, 90-112</b>                                                      |
|                                     | <b>9c</b>  | Changes in therapeutic intervention (with rationale)                                                   | <b>Page 5, 90-112</b>                                                      |
| <b>Follow-up and<br/>Outcomes</b>   | <b>10a</b> | Clinician and patient-assessed outcomes (if available)                                                 | <b>Page 5, 90-99</b>                                                       |
|                                     | <b>10b</b> | Important follow-up diagnostic and other test results                                                  | <b>Not applicable</b>                                                      |
|                                     | <b>10c</b> | Intervention adherence and tolerability (How was this assessed?)                                       | <b>Page 5, 106-129</b>                                                     |
|                                     | <b>10d</b> | Adverse and unanticipated events                                                                       | <b>Page 5, 95-99</b>                                                       |
| <b>Discussion</b>                   | <b>11a</b> | A scientific discussion of the strengths AND limitations associated with this case report              | <b>Page 9, 190-201</b>                                                     |
|                                     | <b>11b</b> | Discussion of the relevant medical literature <b>with references</b> .                                 | <b>Page 7, 142-189</b>                                                     |
|                                     | <b>11c</b> | The scientific rationale for any conclusions (including assessment of possible causes)                 | <b>Page 7, 142-189</b>                                                     |
|                                     | <b>11d</b> | The primary “take-away” lessons of this case report (without references) in a one paragraph conclusion | <b>Page 10. 202-206</b>                                                    |
| <b>Patient Perspective</b>          | <b>12</b>  | The patient should share their perspective in one to two paragraphs on the treatment(s) they received  | <b>Not applicable</b>                                                      |
| <b>Informed Consent</b>             | <b>13</b>  | Did the patient give informed consent? Please provide if requested                                     | <b>Yes <input type="checkbox"/> No <input checked="" type="checkbox"/></b> |
